# Supplementary material
Source: PubMed Central journal article supplement (PMC5450940)
Supplement: NIHMS859453-supplement-1.pdf [file NIHMS859453-supplement-1.pdf]

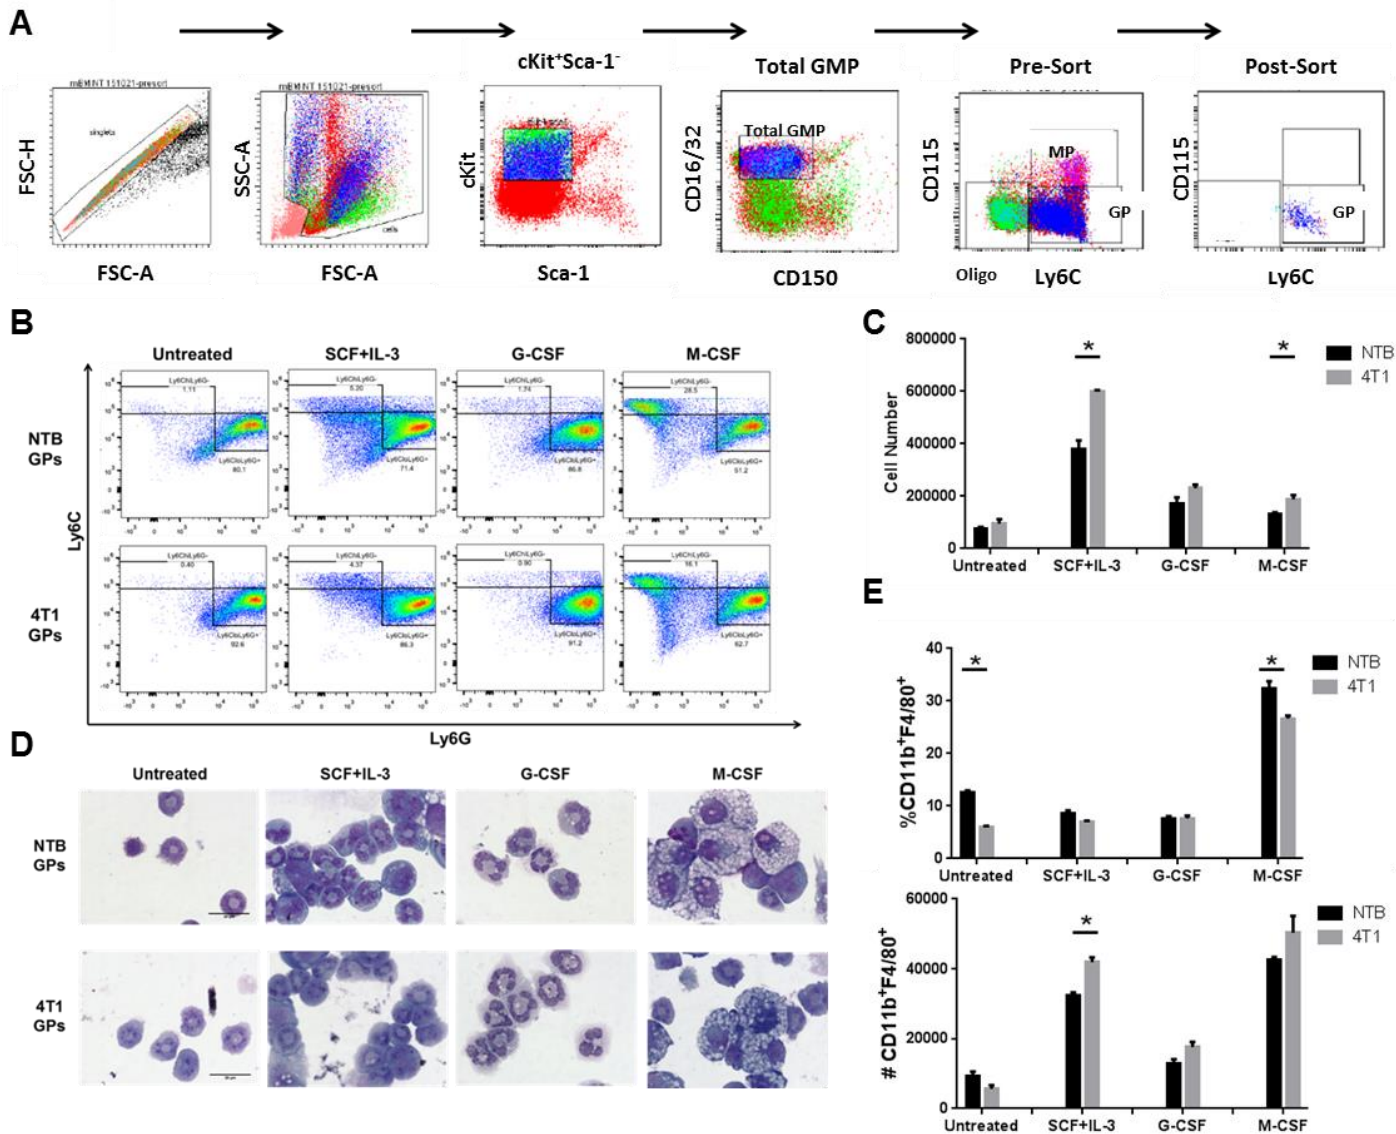

**Supplemental Figure 1:** (A) GPs were sorted from NTB- or 4T1 tumor-bearing lineage-depleted bone marrow cells (as described in the Methods). The scheme represents the flow sorting gating strategy shown in sequence using arrows moving left to right. The various cell populations within the bone marrow are depicted using different colors. The cell populations of interest at each step of the flow sort are specifically highlighted within the gated, boxed regions. GPs were then treated with the indicated hematopoietic cytokine (50 ng/ml) *in vitro* for 4 days. (B) Representative flow plots post-differentiation. (C) Total cell numbers post *in vitro* differentiation. (D) Morphologic analysis of resulting cells after differentiation, as determined by cytopsin. (E) Frequency (upper panel) and absolute number (lower panel) of resulting CD11b<sup>+</sup>F4/80<sup>+</sup> macrophages in each culture condition. Data recorded as mean  $\pm$  SEM of at least triplicate determinations.

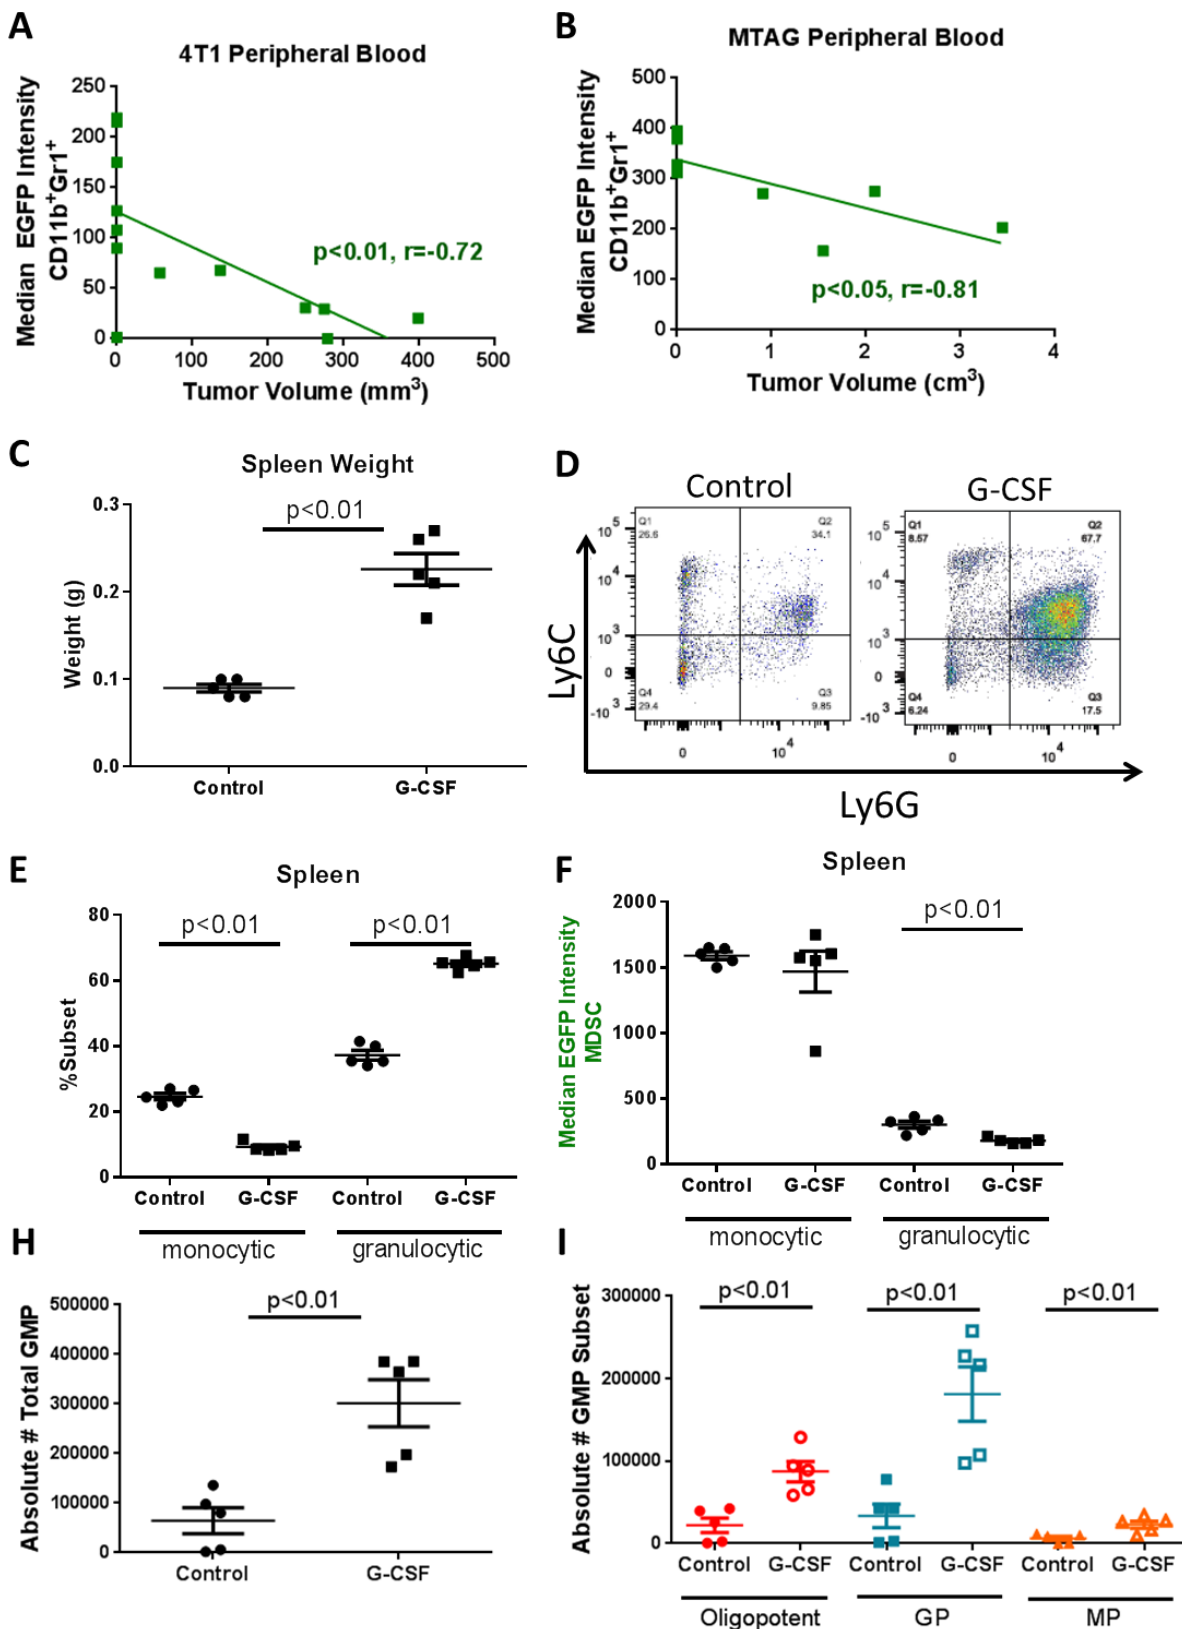

**Supplemental Figure 2:** (A) Peripheral blood myeloid populations were assessed for IRF8 expression over the course of 4T1 (left) and MTAG (right) tumor growth. Data compiled from multiple experiments (NTB, n=8; 4T1, n=17; WT, n=7; MTAG, n=12). Treatment with G-CSF induced splenomegaly, as determined by spleen weight (C). (D) Cells were gated, based on Ly6G and Ly6C expression. Left flow plot, Control; right flow plot, G-CSF-treated. (E) The percentage of each of these cell populations was calculated for the spleen, as well as their expression IRF8 levels. (F) Absolute numbers of total GMPs (H) and GMP (I) subsets in control and G-CSF-treated mice.

|                                | <b>Antigen (anti-mouse)</b> | <b>Clone</b>            | <b>Company</b> | <b>Ref/Catalog #</b> |
|--------------------------------|-----------------------------|-------------------------|----------------|----------------------|
| <b>Bone Marrow</b>             | CD16/32                     | 93                      | eBioscience    | 45-0161-80           |
|                                | Ly6A/E(Sca-1)               | D7                      | eBioscience    | 25-5981-81           |
|                                | Ly-6G/Ly-6C(Gr-1)           | RB6-8C5                 | BioLengend     | 108409               |
|                                | CD135(Flt3)                 | A2F10                   | eBioscience    | 12-1351-82           |
|                                | CD117(c-kit)                | 2B8                     | eBioscience    | 47-1171-82           |
|                                | CD135(c-fms)                | AFS98                   | eBioscience    | 17-1152-82           |
|                                | Ly-6C                       | HK1.4                   | BioLegend      | 128024               |
|                                | CD11b                       | M1/70                   | BD Biosciences | 563168               |
|                                | CD11c                       | N418                    | BioLegend      | 117336               |
|                                | CD8a                        | 53-6.7                  | BioLegend      | 100742               |
|                                | CD45R/B220*                 | RA3-6B2                 | BioLegend      | 103247               |
|                                | CD150                       | TC15-12F12.2            | BioLegend      | 115927               |
|                                | CD105                       | MJ7/18                  | eBioscience    | 48-1051-82           |
|                                | DAPI                        | ThermoFisher Scientific | D1306          |                      |
| <b>Peripheral Blood/Spleen</b> | CD11b                       | M1/70                   | BD Biosciences | 563168               |
|                                | Gr-1                        | RB6-8C5                 | BioLegend      | 108409               |
|                                | CD115                       | AFS98                   | eBioscience    | 117-1152-82          |
|                                | Ly-6C                       | HK1.4                   | BioLegend      | 128024               |
|                                | Ly-6G                       | 1A8                     | BD Biosciences | 551461               |

\*cross-reacts with human

**Supplemental Table 1:** Antibodies used for bone marrow and peripheral blood/spleen analyses.

| Gene Name | Log <sub>2</sub> |          |          | Regulized Fold Change |             |
|-----------|------------------|----------|----------|-----------------------|-------------|
|           | NTB              | GP       | KO       | 4T1                   | KO          |
| Retnlg    | 8.29043          | 10.97135 | 11.8355  | 6.4126436             | 11.67277215 |
| Lars2     | 15.3262          | 17.96311 | 19.49702 | 6.2199761             | 18.01108052 |
| Mmp9      | 8.709462         | 10.96415 | 12.71084 | 4.7723053             | 16.0153239  |
| Mmp8      | 8.549451         | 10.79973 | 12.2084  | 4.7577624             | 12.63142754 |
| Asprv1    | 5.900299         | 7.879544 | 7.383898 | 3.9428659             | 2.796455372 |
| Il1r2     | 6.925273         | 8.859556 | 8.820317 | 3.8218821             | 3.719333651 |
| S100a6    | 7.570323         | 9.421709 | 10.09404 | 3.6084667             | 5.750620152 |
| Adam8     | 6.890789         | 8.698538 | 9.593756 | 3.5009564             | 6.511397948 |
| Adam19    | 6.635024         | 8.429042 | 8.167524 | 3.4677931             | 2.892867296 |
| Lilr4b    | 7.422225         | 9.132798 | 9.212124 | 3.2729078             | 3.457907449 |
| Lilrb4a   | 8.147029         | 9.853144 | 10.12838 | 3.2628099             | 3.948630819 |
| Cxcr2     | 9.153799         | 10.83223 | 11.13141 | 3.2007994             | 3.938395896 |
| Slfn1     | 6.66641          | 8.321413 | 9.237446 | 3.1492395             | 5.942360984 |
| Cd101     | 6.055984         | 7.663265 | 8.071147 | 3.04677               | 4.042263106 |
| Ifitm6    | 7.647062         | 9.149564 | 11.46248 | 2.8333363             | 14.07850416 |
| Tlr13     | 6.93427          | 8.432792 | 8.761663 | 2.8255311             | 3.548952073 |
| Fpr2      | 7.039048         | 8.47983  | 10.69451 | 2.7146803             | 12.60098878 |
| Cd300lf   | 7.667894         | 9.099444 | 9.79747  | 2.6973625             | 4.375886103 |
| Lrg1      | 8.838277         | 10.25512 | 10.38295 | 2.6699992             | 2.917377735 |
| Pirb      | 8.43428          | 9.831673 | 11.25891 | 2.6342507             | 7.084327133 |
| Ccr1      | 7.652278         | 9.010551 | 9.28332  | 2.5637797             | 3.09736556  |
| Rn45s     | 19.45192         | 20.67164 | 21.76547 | 2.3290252             | 4.971039894 |
| Fpr1      | 6.111118         | 7.326751 | 8.473056 | 2.3224256             | 5.14060387  |
| Rasgrp4   | 7.187943         | 8.38357  | 10.13587 | 2.2904436             | 7.716378772 |
| Tgfb1     | 8.88655          | 10.05484 | 10.81257 | 2.2474542             | 3.800046012 |
| Dgat2     | 9.793883         | 10.95392 | 11.09984 | 2.2346337             | 2.472471764 |
| Cd33      | 7.942221         | 9.097606 | 10.67575 | 2.2274385             | 6.650828063 |
| Mctp2     | 7.163679         | 8.301588 | 8.824375 | 2.2006187             | 3.16169116  |
| C5ar1     | 7.709306         | 8.833099 | 9.945854 | 2.1791917             | 4.712681935 |
| Bst1      | 5.482441         | 6.58988  | 6.533696 | 2.1546284             | 2.07233137  |
| Grina     | 9.580544         | 10.67655 | 10.86787 | 2.1376256             | 2.440754478 |
| Glipr2    | 9.239132         | 10.30204 | 11.35861 | 2.0891421             | 4.345371135 |
| Rn4.5s    | 8.867328         | 9.907648 | 9.953512 | 2.056684              | 2.123117416 |
| Slc2a3    | 8.87444          | 9.899414 | 11.55753 | 2.0349227             | 6.422289378 |
| Cd300ld   | 5.46852          | 6.480578 | 6.52703  | 2.0167849             | 2.082779011 |
| Angpt1    | 6.947556         | 5.932741 | 5.872452 | 0.4948916             | 0.47463671  |
| Ly86      | 7.906524         | 6.857141 | 6.688623 | 0.4831749             | 0.429907643 |
| Klf4      | 7.704944         | 6.650646 | 6.516185 | 0.4815316             | 0.438680303 |
| Abcb1b    | 8.009921         | 6.943699 | 6.728985 | 0.4775679             | 0.41152829  |
| Zbtb16    | 9.074367         | 8.003288 | 7.578669 | 0.4759629             | 0.354609228 |
| Jun       | 11.17541         | 10.09909 | 10.14618 | 0.4742378             | 0.48996949  |
| Dpp4      | 7.83358          | 6.681498 | 6.559544 | 0.4499755             | 0.413501278 |
| Ly6c1     | 11.14542         | 9.93469  | 9.9188   | 0.4320503             | 0.427317608 |
| Eml5      | 10.24874         | 9.02489  | 8.415235 | 0.4281395             | 0.280582633 |
| Cd34      | 11.17917         | 9.953686 | 9.635086 | 0.4276555             | 0.342914603 |
| Hspa1a    | 12.39641         | 11.11947 | 9.998023 | 0.412672              | 0.189677126 |
| Hspa1b    | 12.55435         | 11.2336  | 10.13778 | 0.4003275             | 0.187301273 |
| Irf8      | 11.45065         | 9.947257 | 10.37579 | 0.352722              | 0.474716134 |
| Apba1     | 8.541423         | 6.934611 | 6.593027 | 0.328323              | 0.259104072 |
| Rasa4     | 8.98375          | 7.282071 | 7.141088 | 0.307428              | 0.278806774 |
| Fosb      | 9.139596         | 6.483936 | 7.285816 | 0.1586962             | 0.276666547 |

**Supplemental Table 2:** Differentially regulated genes detected by RNA-seq. Fold-change normalized to NTB control.
